# Supplementary material for: Validation of the HeLD-14 functional oral health literacy instrument in a general population
Source: PeerJ. 2023 Oct 10;11:e16106. doi: 10.7717/peerj.16106 (PMC10573372; doi:10.7717/peerj.16106)
Supplement: Supplemental Information 2 [file peerj-11-16106-s002.xlsx]

## Sheet: Sheet 1
ToothOrConsequencesII_DataDictionary_2023-07-03 (1)
Variable / Field Name	Form Name	Section Header	Field Type	Field Label	Choices, Calculations, OR Slider Labels	Text Validation Type OR Show Slider Number	Text Validation Min	Text Validation Max	Required Field?	Matrix Group Name
date	demographics		text	Date		date_mdy			y
ohl_attn	demographics	Oral Health Literacy	radio	Are you able to pay attention to your dental or oral health needs?	0, Unable to do | 1, Very difficult | 2, With some difficulty | 3, Little difficulty | 4, No difficulty				y	ohl
ohl_time	demographics		radio	Are you able to make time for things that are good for your dental or oral health?	0, Unable to do | 1, Very difficult | 2, With some difficulty | 3, Little difficulty | 4, No difficulty				y	ohl
ohl_read	demographics		radio	Are you able to read written dental information (e.g., leaflets given to you) by your dentist?	0, Unable to do | 1, Very difficult | 2, With some difficulty | 3, Little difficulty | 4, No difficulty				y	ohl
ohl_appt_supp	demographics		radio	Are you able to take family or a friend with you to a dental appointment?	0, Unable to do | 1, Very difficult | 2, With some difficulty | 3, Little difficulty | 4, No difficulty				y	ohl
ohl_pay	demographics		radio	Are you able to pay to see a dentist?	0, Unable to do | 1, Very difficult | 2, With some difficulty | 3, Little difficulty | 4, No difficulty				y	ohl
ohl_meds	demographics		radio	Are you able to pay for medication to manage your dental or oral health?	0, Unable to do | 1, Very difficult | 2, With some difficulty | 3, Little difficulty | 4, No difficulty				y	ohl
ohl_transp	demographics		radio	Do you know how to get to a dentist's appointment?	0, Unable to do | 1, Very difficult | 2, With some difficulty | 3, Little difficulty | 4, No difficulty				y	ohl
ohl_2opinion	demographics		radio	Are you able to look for a second opinion about your dental health from a dental health professional?	0, Unable to do | 1, Very difficult | 2, With some difficulty | 3, Little difficulty | 4, No difficulty				y	ohl
ohl_make_dec	demographics		radio	Are you able to use information from a dentist to make decisions about your dental health?	0, Unable to do | 1, Very difficult | 2, With some difficulty | 3, Little difficulty | 4, No difficulty				y	ohl
ohl_carry_out_inst	demographics		radio	Are you able to carry out dental instructions that a dentist gives you?	0, Unable to do | 1, Very difficult | 2, With some difficulty | 3, Little difficulty | 4, No difficulty				y	ohl
ohl_use_advice	demographics		radio	Are you able to use advice from a dentist to make decisions about your dental health?	0, Unable to do | 1, Very difficult | 2, With some difficulty | 3, Little difficulty | 4, No difficulty				y	ohl
ohl_brochues	demographics		radio	Are you able to read dental or oral health information brochures left in dental clinics and waiting rooms?	0, Unable to do | 1, Very difficult | 2, With some difficulty | 3, Little difficulty | 4, No difficulty				y	ohl
ohl_ask_support	demographics		radio	Are you able to ask someone to go with you to a dental appointment?	0, Unable to do | 1, Very difficult | 2, With some difficulty | 3, Little difficulty | 4, No difficulty				y	ohl
ohl_make_appt	demographics		radio	Do you know what to do to get a dentist's appointment?	0, Unable to do | 1, Very difficult | 2, With some difficulty | 3, Little difficulty | 4, No difficulty				y	ohl
ohip_function	demographics	OHIP-5 How often have you had the following problems within the last 12 months?	radio	Have you had difficulty chewing any foods because of problems with your teeth, mouth, dentures or jaw?	4, Very often | 3, Fairly often | 2, Occasionally | 1, Hardly ever | 0, Never				y	ohip_q
ohip_pain	demographics		radio	Have you had painful aching in your mouth?	4, Very often | 3, Fairly often | 2, Occasionally | 1, Hardly ever | 0, Never				y	ohip_q
ohip_appear	demographics		radio	Have you felt uncomfortable about the appearance of your teeth, mouth dentures or jaws?	4, Very often | 3, Fairly often | 2, Occasionally | 1, Hardly ever | 0, Never				y	ohip_q
ohip_less_flav	demographics		radio	Have you felt that there has been less flavor in your food because of problems with your teeth, mouth, dentures or jaws?	4, Very often | 3, Fairly often | 2, Occasionally | 1, Hardly ever | 0, Never				y	ohip_q
ohip_diff_job	demographics		radio	Have you had difficulty doing your usual jobs because of problems with your teeth, mouth, dentures or jaws?	4, Very often | 3, Fairly often | 2, Occasionally | 1, Hardly ever | 0, Never				y	ohip_q
age	demographics	About You	text	What is your age in years?		number	18	105	y
gender	demographics		radio	Gender	1, Male | 2, Female | 3, Non-binary | 4, Prefer to self-describe {gender_other} | 5, Prefer not to anser				y
gender_other	demographics		text
education	demographics		radio	What is the highest grade or level of school that you have completed?	1, 8th grade or less | 2, Some high school but did not graduate | 3, High school graduate or GED | 4, Some college or 2-year degree | 5, 4 year college graduate | 6, More than 4-year college degree				y
ethnicity	demographics		radio	Ethnicity	0, Hispanic or Latino | 1, NOT Hispanic or Latino
race	demographics		checkbox	Race (check all that apply)	1, White | 2, Black or African American | 3, Asian | 4, Native Hawaiian or other Pacific Islander | 5, American Indian or Alaska Native | 6, Other
